# Supplementary material
Source: publisher site journal article supplement (https://www.dovepress.com/get_supplementary_file.php?f=434854.docx)
Supplement: Supplementary file 1 [file get_supplementary_file.php]

**Table S1.** Aptamer and complementary DNA sequences used in the experiments

| **Name** | **Sequence (5' - 3')** |
| --- | --- |
| PDGF-B | SH-(CH2)6-TTTTACTCAGGGCACTGCAAGCAATTGTGGTCCCAATGGGCTGAG |
| thrombin | SH-(CH2)6-TTTTTTTTTTTTTTTAGTCCGTGGTAGGGCAGGTGGGGGTGACT |
| ssDNA1 | CTTGCAGTGCCCTGAGTAAAA-5-FAM |
| ssDNA2 | CCACCTGCCCTACCACGGACT-Cy5 |

**Table S2.** Information of clinical serum samples.

| **ID** | **Age** | **Gender** | **TNM Stage** | **ID** | **Age** | **Gender** | **TNM Stage** |
| --- | --- | --- | --- | --- | --- | --- | --- |
| 1 | 39 | male | IA | 1 | 50 | male | health |
| 2 | 56 | male | IA | 2 | 44 | male | health |
| 3 | 47 | male | IA | 3 | 43 | male | health |
| 4 | 49 | female | IA | 4 | 38 | male | health |
| 5 | 44 | male | IA | 5 | 51 | male | health |
| 6 | 45 | female | IB | 6 | 56 | male | health |
| 7 | 47 | male | IB | 7 | 42 | male | health |
| 8 | 54 | male | IB | 8 | 47 | male | health |
| 9 | 39 | male | IB | 9 | 56 | male | health |
| 10 | 42 | male | IIA | 10 | 48 | male | health |
| 11 | 57 | female | IIA | 11 | 59 | male | health |
| 12 | 64 | female | IIA | 12 | 43 | male | health |
| 13 | 51 | male | IIA | 13 | 38 | male | health |
| 14 | 49 | female | IIA | 14 | 35 | male | health |
| 15 | 47 | female | IIA | 15 | 41 | male | health |
| 16 | 52 | female | IIB | 16 | 44 | female | health |
| 17 | 59 | male | IIB | 17 | 47 | female | health |
| 18 | 64 | male | IIB | 18 | 47 | female | health |
| 19 | 57 | female | IIB | 19 | 51 | female | health |
| 20 | 43 | female | IIB | 20 | 53 | female | health |
| 21 | 48 | male | IIB | 21 | 54 | female | health |
| 22 | 56 | female | IIIA | 22 | 56 | female | health |
| 23 | 52 | male | IIIA | 23 | 48 | female | health |
| 24 | 57 | male | IIIA | 24 | 47 | female | health |
| 25 | 45 | female | IIIB | 25 | 57 | female | health |
| 26 | 49 | male | IIIB | 26 | 47 | female | health |
| 27 | 55 | male | IIIB | 27 | 49 | female | health |
| 28 | 50 | male | IIIC | 28 | 47 | female | health |
| 29 | 62 | male | IV | 29 | 51 | female | health |
| 30 | 58 | male | IV | 30 | 54 | female | health |


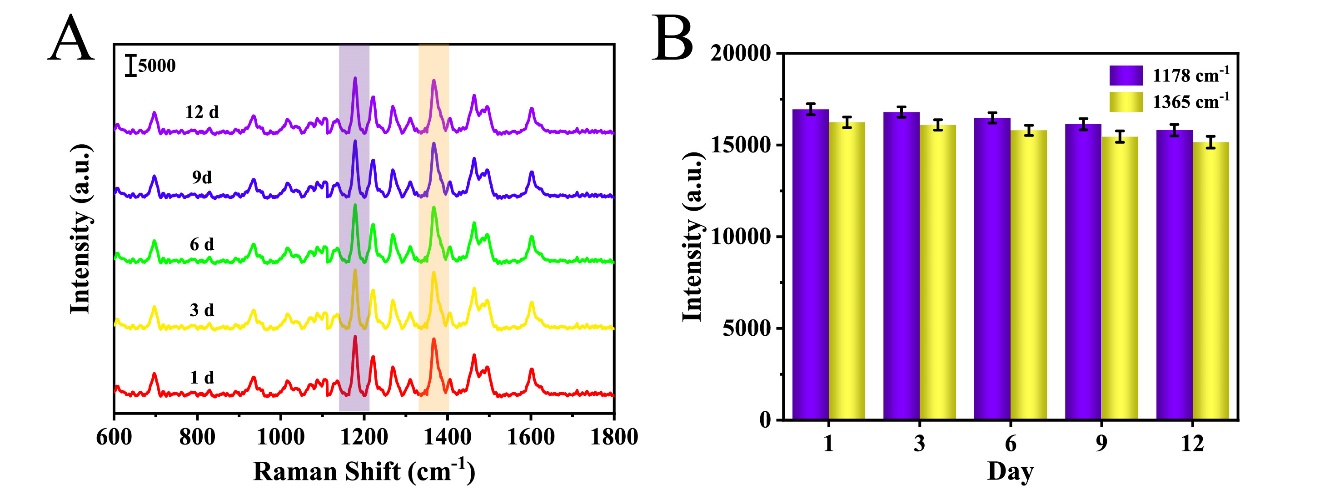


**Fig. S1.** (A) SERS spectra obtained after storage for different times (1d, 3d, 6d, 9d, and 12d) and (B) the intensities of the peaks corresponding to the features at 1178 cm-1 and 1365 cm-1.
